# Supplementary material for: Antiferroelectric negative capacitance from a structural phase transition in zirconia
Source: PubMed Central journal article supplement (PMC8907358; doi:10.1038/s41467-022-28860-1), 2022-03-09
Supplement: 41467_2022_28860_MOESM1_ESM.pdf [file 41467_2022_28860_MOESM1_ESM.pdf]

# Supplementary Information: Antiferroelectric negative capacitance from a structural phase transition in zirconia

## Supplementary Methods

**Phenomenological model of antiferroelectric negative capacitance.** According to Kittel's phenomenological model of antiferroelectricity<sup>1-3</sup>, an antiferroelectric crystal can be represented by two sub-lattices with anti-parallel polarization vectors with magnitudes of  $P_a$  and  $P_b$ . The free energy density  $G$  can be expressed in terms of sub-lattice polarizations  $P_a$  and  $P_b$  as follows.

$$G = a(P_a^2 + P_b^2) + b(P_a^4 + P_b^4) + hP_aP_b - (P_a + P_b)E_a \quad (1)$$

Here,  $a < 0$ ,  $b > 0$  are anisotropy constants.  $h > 0$ , which represent the anti-polar coupling between the sub-lattices. The system can be conveniently described in terms of two state variables: the staggered polarization  $Q = P_a - P_b$ , which is often considered the true antiferroelectric order parameter, and the macroscopically measurable polarization  $P = P_a + P_b$ . Substituting  $P_a = (P + Q)/2$  and  $P_b = (P - Q)/2$  in Eq. (1), the free energy density of an antiferroelectric material,  $G$ , can be expressed as follows.

$$G = \frac{1}{2}(a + \frac{1}{2}h)P^2 + \frac{1}{2}(a - \frac{1}{2}h)Q^2 + \frac{1}{8}b(P^4 + Q^4 + 6P^2Q^2) - PE_a \quad (2)$$

Defining  $\alpha = (a + h/2)/2$ ,  $\beta = (a - h/2)/2$  and  $\zeta = b/8$ , the following equation is obtained.

$$G = \alpha P^2 + \beta Q^2 + \zeta(P^4 + Q^4 + 6P^2Q^2) - PE_a \quad (3)$$

Furthermore,  $\beta = \lambda(T - T_C)$  and  $\alpha = \lambda(T - T_C) + h/2$  where  $T$  and  $T_C$  are the temperature and the Curie temperature of the antiferroelectric, respectively and  $\lambda > 0$ . When  $T_C - h/2\lambda < T < T_C$ ,

$\alpha > 0$  and  $\beta < 0$ , and the  $P - E_a$  curve exhibits two non-overlapping hysteresis loops as shown in Fig. 1a. Minimizing  $G$  with respect to  $P$  and  $Q$  for a given  $E_a$  leads to the following relations.

$$\frac{\partial G}{\partial P} = 2\alpha P + 4\zeta P^3 + 12\zeta PQ^2 - E_a = 0 \quad (4)$$

$$\frac{\partial G}{\partial Q} = 2\beta Q + 4\zeta Q^3 + 12\zeta P^2 Q = 0 \quad (5)$$

Solving Eq. (5), the following relation between  $P$  and  $Q$  is obtained.

$$Q = \begin{cases} \pm \sqrt{-\frac{\beta}{2\zeta} - 3P^2}, & \text{when, } |P| < P_n \text{ (non-polar)} \\ 0, & \text{when, } |P| \geq P_n \text{ (polar)} \end{cases} \quad (6)$$

Here,  $P_n = \sqrt{-\beta/(6\zeta)}$  which defines the  $P$ -boundary between the non-polar reference phase and the polar phase. Note that  $Q \neq 0$  and  $Q = 0$  represent the non-polar reference phase and the polar phase, respectively. Replacing  $Q$  with the expression in Eq. (6) in Eq. (1),  $G$  can be expressed in terms of  $P$  as follows.

$$G = \begin{cases} (\alpha - 3\beta)P^2 - 8\zeta P^4 - PE_a - \frac{\beta^2}{4\zeta}, & \text{when, } |P| < P_n \text{ (non-polar)} \\ \alpha P^2 + \zeta P^4 - PE_a, & \text{when, } |P| \geq P_n \text{ (polar)} \end{cases} \quad (7)$$

Eq. (7) is used to generate the antiferroelectric energy landscapes at  $E_a = 0$  and  $E_a = \pm E_1$  in Fig.

1b-d.  $\partial^2 G/\partial P^2$  is calculated as follows.

$$\frac{\partial^2 G}{\partial P^2} = \begin{cases} 2(\alpha - 3\beta) - 96\zeta P^2, & \text{when, } |P| < P_n \text{ (non-polar)} \\ 2\alpha + 12\zeta P^2, & \text{when, } |P| \geq P_n \text{ (polar)} \end{cases} \quad (8)$$

According to Eq. (8),  $\partial^2 G/\partial P^2 < 0$  when  $P_{nn} \leq |P| \leq P_n$  with  $P_{nn} = \sqrt{(\alpha - 3\beta)/(48\zeta)}$ . This range of  $P$  corresponds the segments BC and B'C' shown in Fig. 1. Combining Eq. (4) and (6),

the following relation between  $E_a$  and  $P$  can be obtained.

$$E_a = \begin{cases} 2(\alpha - 3\beta)P - 32\zeta P^3, & \text{when, } |P| < P_n \text{ (non-polar)} \\ 2\alpha P + 4\zeta P^3, & \text{when, } |P| \geq P_n \text{ (polar)} \end{cases} \quad (9)$$

Note in Eq. (9) that  $(\alpha - 3\beta) > 0$  since  $\alpha > 0$  and  $\beta < 0$  for which the  $P - E_a$  curve has positive slope at and around  $P = 0$  in the non-polar reference phase. On the other hand, it can be shown that  $\partial E_a / \partial P < 0$ , when  $P_{nn} \leq |P| \leq P_n$  which results in the negative capacitance segments BC and B'C' in Fig. 1a.

**Modeling of antiferroelectric negative capacitance field-effect transistors** A well-designed antiferroelectric negative capacitance field-effect transistor (NCFET) can be obtained by the shifting  $P - E_a$  curve through work-function engineering as experimentally demonstrated in Ref. <sup>4</sup> and by using only one of the two negative capacitance regions. In that case, the NCFET will be in a positive capacitance state in its off-state condition, and will provide a boost in the on-current for a given off-current due to the antiferroelectric negative capacitance. We modeled an antiferroelectric NCFET in which a 1.8 nm antiferroelectric layer is used in the gate dielectric stack of a 15 nm node baseline FinFET. The industry standard 15 nm Berkeley SPICE Insulated-Gate-FET Model: Common Multi Gate (BSIM-CMG) model is used to simulate the baseline FinFET. Following are the baseline FinFET device parameters of the Nangate FreePDK15 Open Cell Library (15 nm technology) used: fin height  $H_{fin} = 42$  nm, fin thickness  $T_{fin} = 7$  nm and gate length  $L_G = 20$  nm. The antiferroelectric oxide layer is modeled using the relation:  $E_a(Q) = \alpha_{AF}(Q - Q_o) + \beta_{AF}(Q - Q_o)^3 - E_{bias}$ , where  $E_a$  is the electric field in the antiferroelectric layer,  $Q$  is the polarization/surface charge density,  $\alpha_{AF}$  and  $\beta_{AF}$  are anisotropy constants

of the antiferroelectric, and  $E_{bias}$  is a built in electric field obtained by work-function engineering. The anisotropy constants are related to the antiferroelectric polarization  $P_o^{AF}$  and the width of the antiferroelectric hysteresis loop  $E_H$  by the relations:  $\alpha_{AF} = -3\sqrt{3}/2 \times (E_H/P_o^{AF})$  and  $\beta_{AF} = 6\sqrt{3} \times E_H/(P_o^{AF})^3$ . For our simulations, we first fitted  $P_o^{AF} = 15 \mu\text{C cm}^{-2}$  and  $E_H = 1.8 \text{ MV cm}^{-1}$  to the experimental data for 10 nm  $\text{ZrO}_2$  as shown in Supplementary Fig. 11. However, recently, it was found that the distance between the critical fields of the tetragonal-to-orthorhombic and the orthorhombic-to-tetragonal phase transitions increases with decreasing  $\text{ZrO}_2$  thickness, due to an increase in the tetragonality of the unit cell.<sup>5</sup> To accommodate for this increased tetragonality expected for a 1.8 nm thick  $\text{ZrO}_2$  film in an NCFET, we increased  $E_H$  to 3  $\text{MV cm}^{-1}$  for the simulation.  $Q_o = A_G \times P_o^{AF}/2$  where  $A_G$  is the FinFET gate area. We implemented a compact model of AFE NCFET that self consistently solves the BSIM-CMG model of the baseline FinFET and the antiferroelectric  $E_a(Q)$  relation. The off-current was set to 10 nA for the antiferroelectric NCFET and the baseline FinFET.

Supplementary Fig. 13a shows the drain current  $I_D$ -gate voltage  $V_{GS}$  characteristics of an n-type antiferroelectric NCFET and the equivalent n-type baseline FinFET at a drain voltage  $V_{DS} = 0.8 \text{ V}$ , which is the nominal voltage of the 15 nm technology node. At the off-state and in the subthreshold region, the antiferroelectric layer does not provide any improvement in the subthreshold swing as shown in Extended Data. Fig. 13b; however, it enters the negative capacitance region at much higher current levels for which it provides a significant boost in the on-current. Using a Synopsys HSPICE simulation tool, we also simulated a fan-out 4 (FO4) inverter (an inverter driving four identical inverters) based on antiferroelectric NCFETs at the power supply voltage

$V_{DD}=0.8$  V and 0.46 V and compared its characteristics with that based on the baseline FET operating at  $V_{DD}=0.8$  V. We note in Table 1 that the antiferroelectric NCFET inverter operating at  $V_{DD} = 0.46$  V provides the same performance (*i.e.* delay) as that of the baseline FinFET inverter at  $V_{DD} = 0.8$  V. As such, in this case, an iso-performance power reduction of 41% is obtained by using the antiferroelectric NCFET.

**Table 1: Power and performance comparison between an antiferroelectric (AFE) negative capacitance field-effect transistor (NCFET) and the equivalent baseline transistor.** The AFE NCFET operating at a power supply voltage  $V_{DD} = 0.46$  V achieves the same performance as that of the baseline transistor at  $V_{DD} = 0.8$  V, thereby reducing the power dissipation by 41% in this particular simulation. The AFE NCFET simulations was performed by implementing a compact model based on the industry standard 15 nm Berkeley SPICE Insulated-Gate-FET Model: Common Multi Gate (BSIM-CMG) model.

|                    | Baseline FinFET |        | Antiferroelectric NCFET |       |
|--------------------|-----------------|--------|-------------------------|-------|
| $V_{DD}$ (V)       | 0.80            | 0.46   | 0.80                    | 0.46  |
| Average Delay (ps) | 6.155           | 10.800 | 3.989                   | 6.122 |
| Total Power (fW)   | 4.110           | 1.153  | 6.570                   | 2.425 |

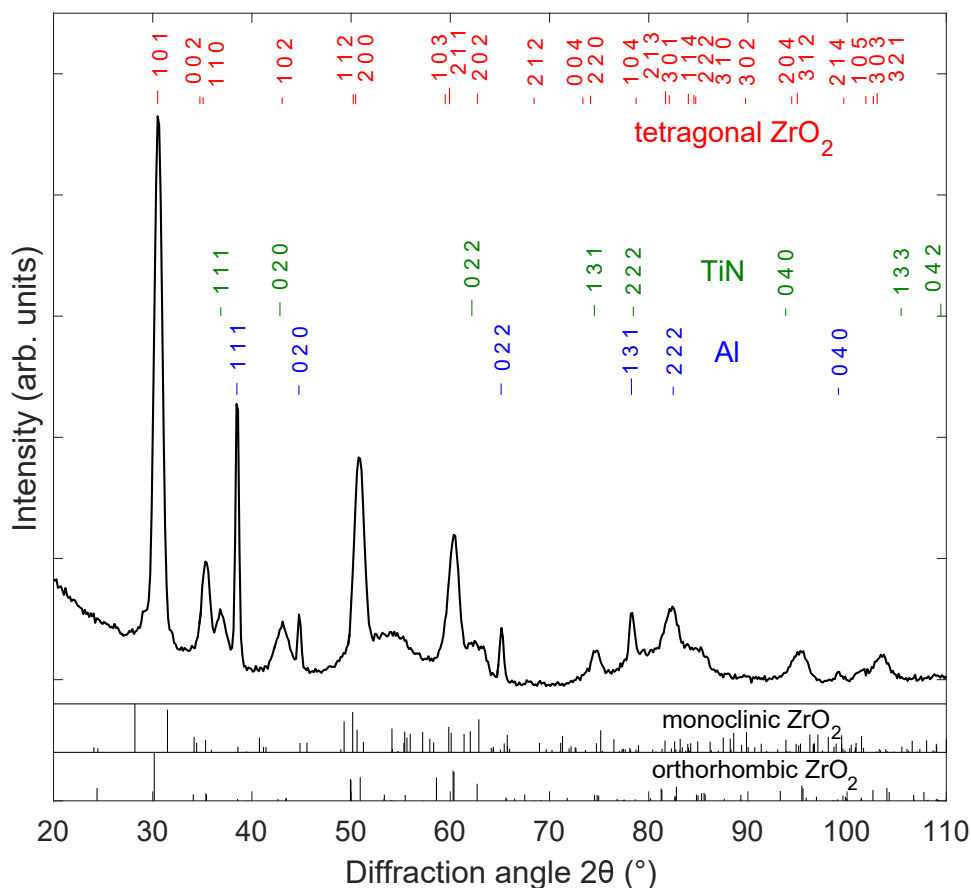

Supplementary Fig. 1: **Grazing-incidence X-ray diffraction measurement of ZrO<sub>2</sub>.** Diffraction patterns and their indices for tetragonal ZrO<sub>2</sub> as well as TiN and Al phases are marked in the figure. For comparison, the position of the diffraction peaks of orthorhombic ZrO<sub>2</sub> and monoclinic ZrO<sub>2</sub> are indicated at the bottom. The Bragg peaks for ZrO<sub>2</sub> match well with those of the tetragonal structure. No fractions of the orthorhombic and monoclinic phase were observed in our samples based on X-ray diffraction data, which is consistent with scanning transmission electron microscopy and nanobeam electron diffraction results (see Fig. 2b and Supplementary Fig. 3).

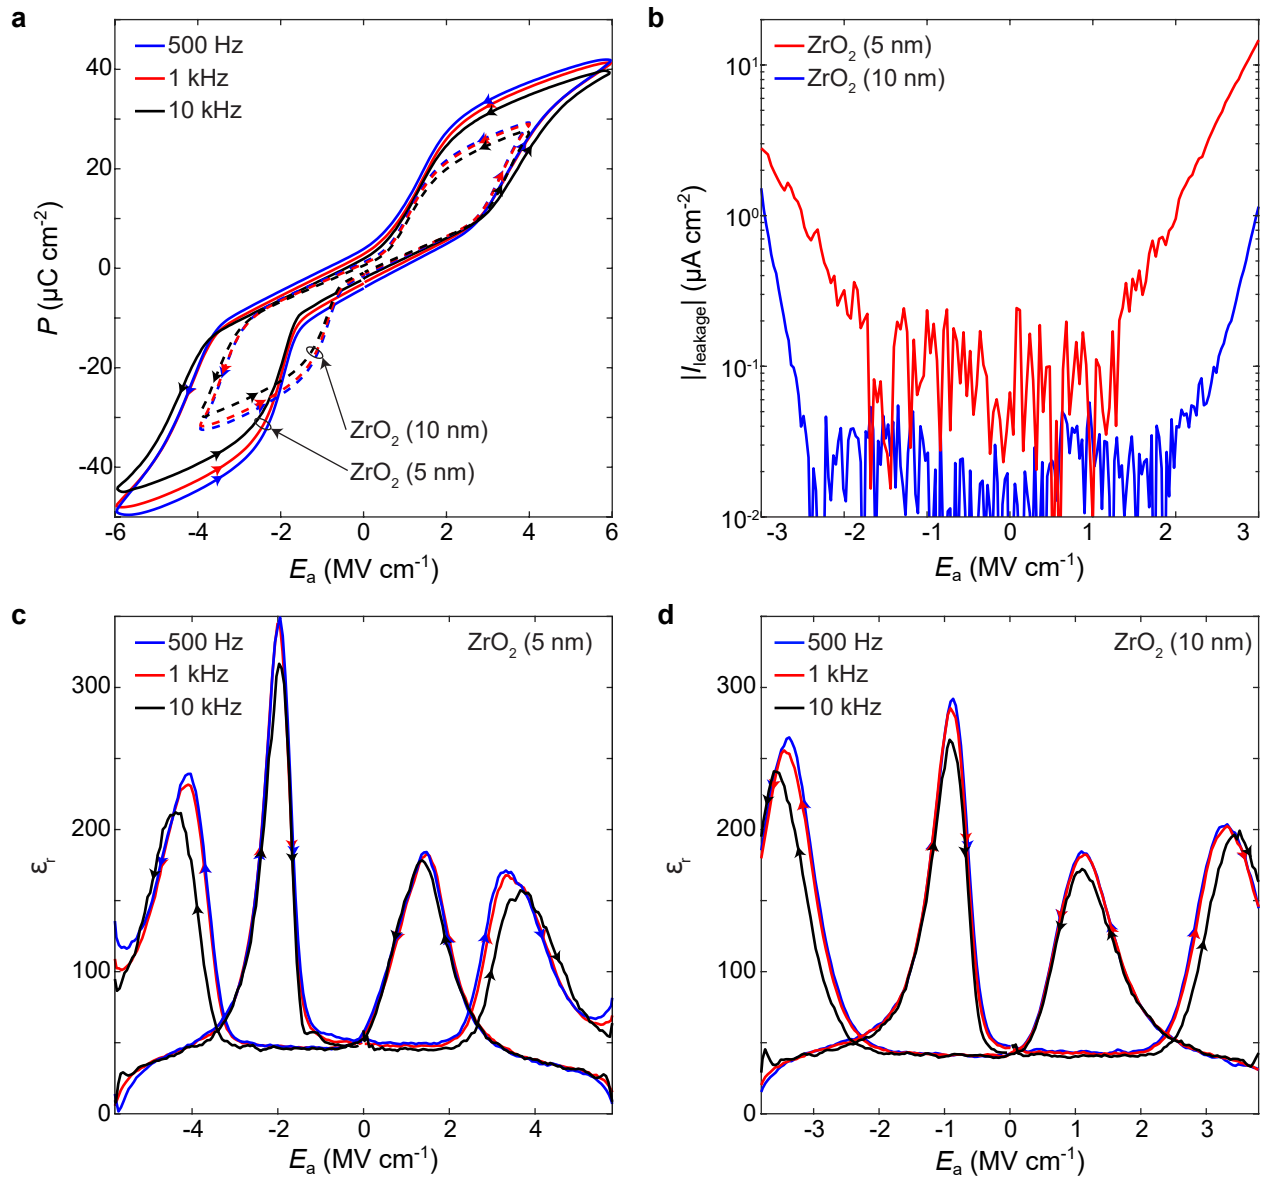

Supplementary Fig. 2: **Electric characterization of stand-alone ZrO<sub>2</sub> capacitors.** **a** Polarization  $P$  - electric field  $E_a$  loops of 5 nm (solid line) and 10 nm (dashed line) ZrO<sub>2</sub> capacitors at 500 Hz, 1 kHz, and 10 kHz. **b** Leakage current  $I_{leakage}$  - electric field plot for 10 nm (blue color) and 5 nm (red color) ZrO<sub>2</sub> capacitors. **c, d** Dielectric constant  $\epsilon_r$  - electric field curve of 5 nm and 10 nm ZrO<sub>2</sub> capacitors at 500 Hz, 1 kHz, and 10 kHz, respectively. The dielectric constant is obtained by differentiating the polarization  $P$  - electric field  $E_a$  plot in **a**.

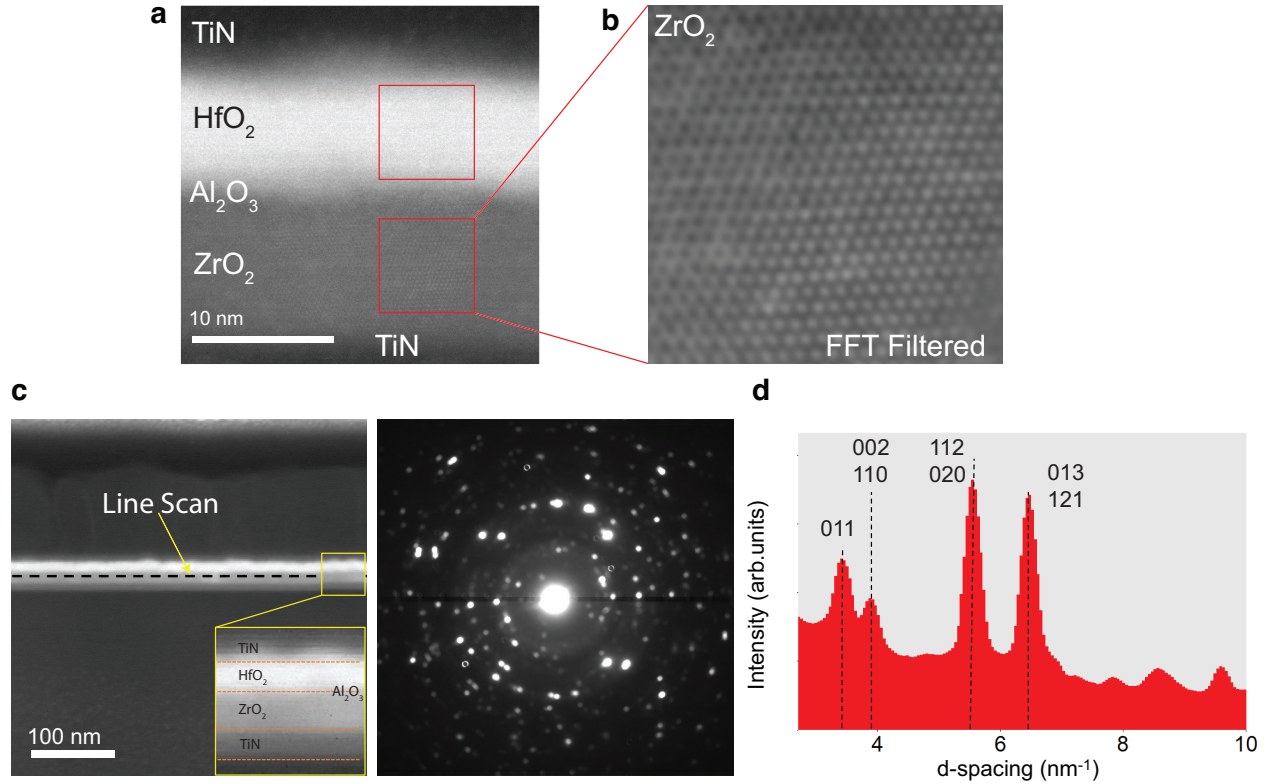

Supplementary Fig. 3: **Phase determination of  $ZrO_2$  in dielectric-antiferroelectric heterostructures.** **a** High magnification high angle annular dark field (HAADF) scanning transmission electron microscopy (STEM) image of the cross-section of the same TiN/HfO<sub>2</sub>/Al<sub>2</sub>O<sub>3</sub>/ZrO<sub>2</sub>/TiN heterostructure shown in Fig. 2b. Fast Fourier transform (FFT) patterns shown in Fig. 2b were taken from regions under the red squares in the HfO<sub>2</sub> and ZrO<sub>2</sub> layers. **b** The enlarged, FFT filtered image taken from the region in ZrO<sub>2</sub>. **c** HAADF-STEM image of the heterostructure with a line scan region along which nanobeam diffraction patterns were collected highlighted by dashed black lines. An enlarged image taken from the yellow region shows the TiN, HfO<sub>2</sub>, ZrO<sub>2</sub> and TiN layers with dashed red lines highlighting the interfaces. A total of 200 nanobeam diffraction patterns were collected, with 2 nm spacing between each pattern. The diffraction pattern matches with that of tetragonal ZrO<sub>2</sub> well. **d** Summed radial intensity profile extracted from **b**.... (continues to next page)



Supplementary Fig. 3: (*continues from previous page*) The peak at about  $3.4 \text{ nm}^{-1}$  corresponds to the reflection from  $\{011\}$ . The peak at  $3.9 \text{ nm}^{-1}$  originates from reflections of  $\{002\}$  and  $\{110\}$  where we can not resolve those peaks due to a poor resolution of electron beam diffraction. The peak at  $5.5 \text{ nm}^{-1}$  originates from  $\{112\}$  and  $\{020\}$  and  $6.5 \text{ nm}^{-1}$  from  $\{013\}$  and  $\{121\}$ . The peaks were found to match well with that from a tetragonal structure, not to those of monoclinic and orthorhombic ones.

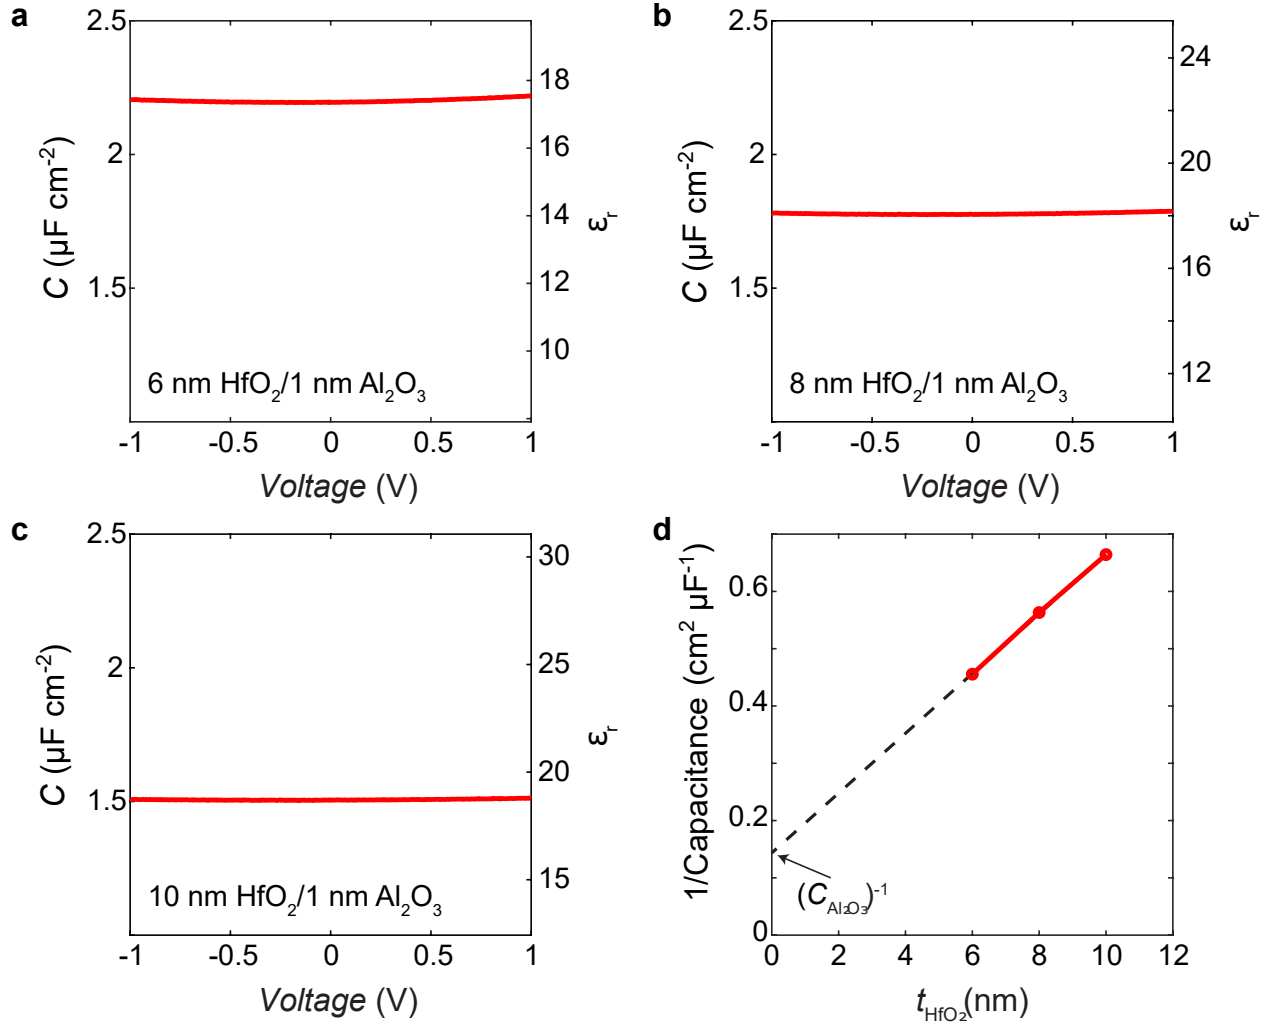

Supplementary Fig. 4: **Electrical characterization of HfO<sub>2</sub>/Al<sub>2</sub>O<sub>3</sub> dielectric stacks.** **a, b, c** Capacitance  $C$  and dielectric constant  $\epsilon_r$  as a function of voltage across HfO<sub>2</sub>/Al<sub>2</sub>O<sub>3</sub>(1 nm) capacitors where the thicknesses of HfO<sub>2</sub> are 6 nm (**a**), 8 nm (**b**), and 10 nm (**c**). **d** Inverse capacitance of the dielectric stacks as a function of HfO<sub>2</sub> thickness. The slope of the curve is  $(\epsilon_0 \epsilon_{\text{HfO}_2})^{-1}$ , and the y-axis intercept is  $C_{\text{Al}_2\text{O}_3}^{-1}$ .  $\epsilon_0$ ,  $\epsilon_{\text{HfO}_2}$  and  $C_{\text{Al}_2\text{O}_3}$  are the vacuum permittivity, the relative dielectric constant of HfO<sub>2</sub> and the capacitance of  $\sim 1$  nm Al<sub>2</sub>O<sub>3</sub> in our dielectric stacks, respectively. The dielectric constants of HfO<sub>2</sub> and Al<sub>2</sub>O<sub>3</sub> are extracted to be  $\sim 21.5$  and  $\sim 8$ , respectively.

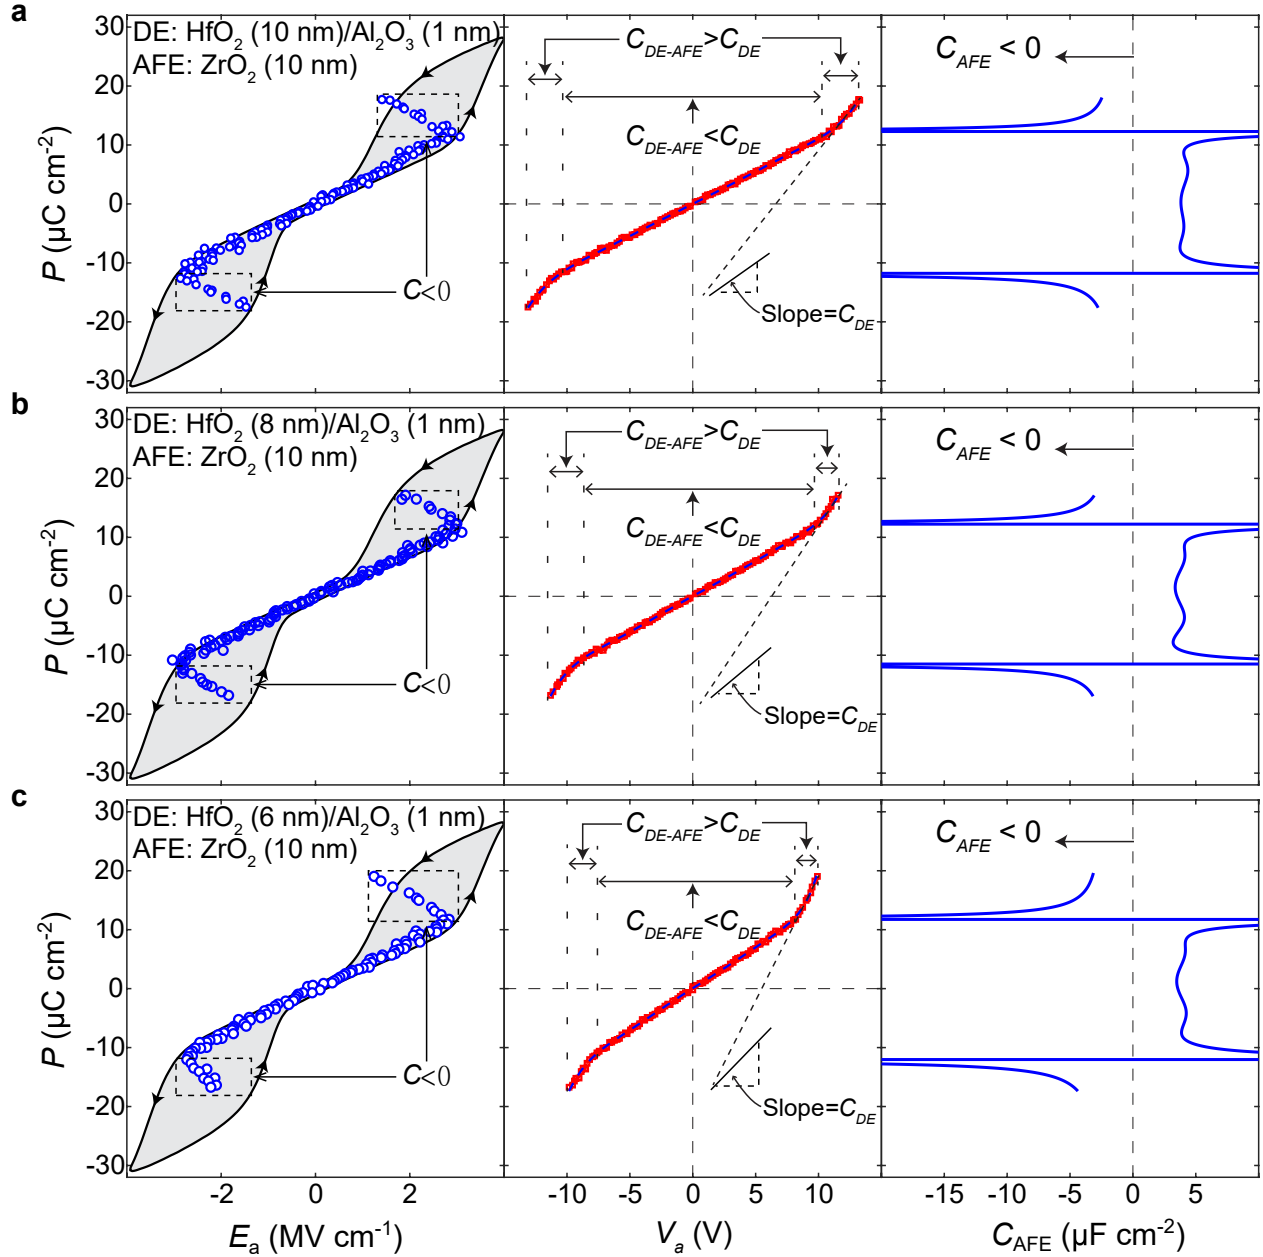

Supplementary Fig. 5: **Dielectric layer thickness dependence of antiferroelectric negative capacitance.** Polarization  $P$  as functions of electric field  $E_a$  of the  $\text{ZrO}_2$  layer, maximum voltage across the dielectric/antiferroelectric capacitor  $V_a$ , antiferroelectric capacitance  $C_{AFE}$  measured in  $\text{HfO}_2/\text{Al}_2\text{O}_3(1 \text{ nm})/\text{ZrO}_2(10 \text{ nm})$  heterostructure capacitors with  $\text{HfO}_2$  thicknesses of 10 nm (a), 8 nm (b), and 6 nm (c).  $C_{DE}$  and  $C_{DE-AFE}$  are the dielectric and total capacitance, respectively.

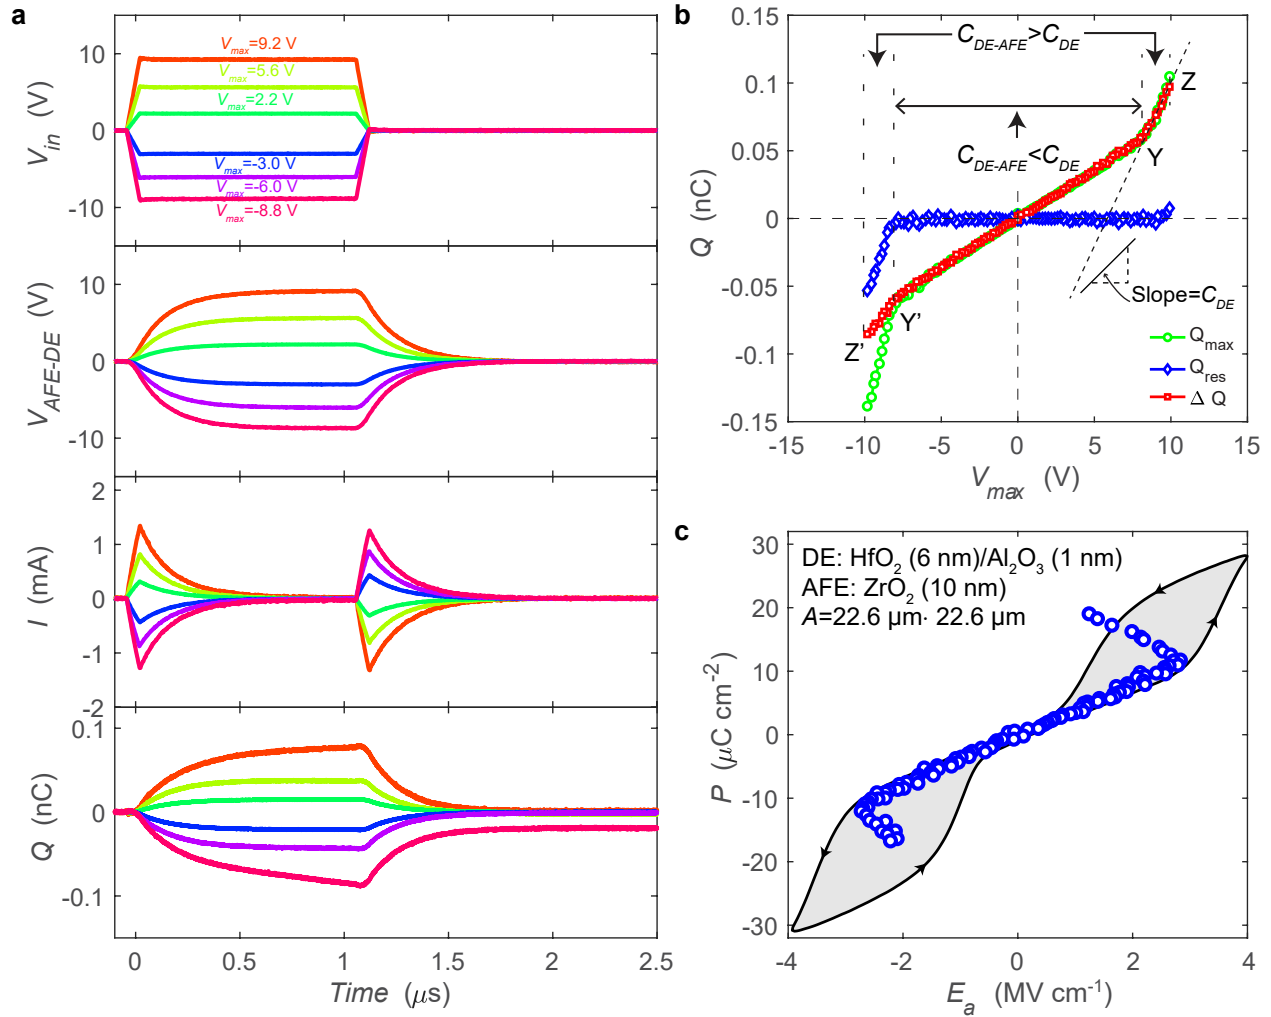

Supplementary Fig. 6: **Electrical measurement of a  $HfO_2(6 \text{ nm})/Al_2O_3(1 \text{ nm})/ZrO_2(10 \text{ nm})$  capacitor.** **a** Time domain waveforms of input voltage  $V_{in}$ , voltage across the heterostructure  $V_{DE-AFE}$ , current through the heterostructure  $I$ , and integrated charges  $Q$ . **b** Maximum charge  $Q_{max}$ , residual charge  $Q_{res}$ , and their difference  $\Delta Q$  as a function of maximum voltage across the heterostructure  $V_a$ . **c** Extracted polarization  $P$  - electric field  $E_a$  of the  $ZrO_2$  layer.

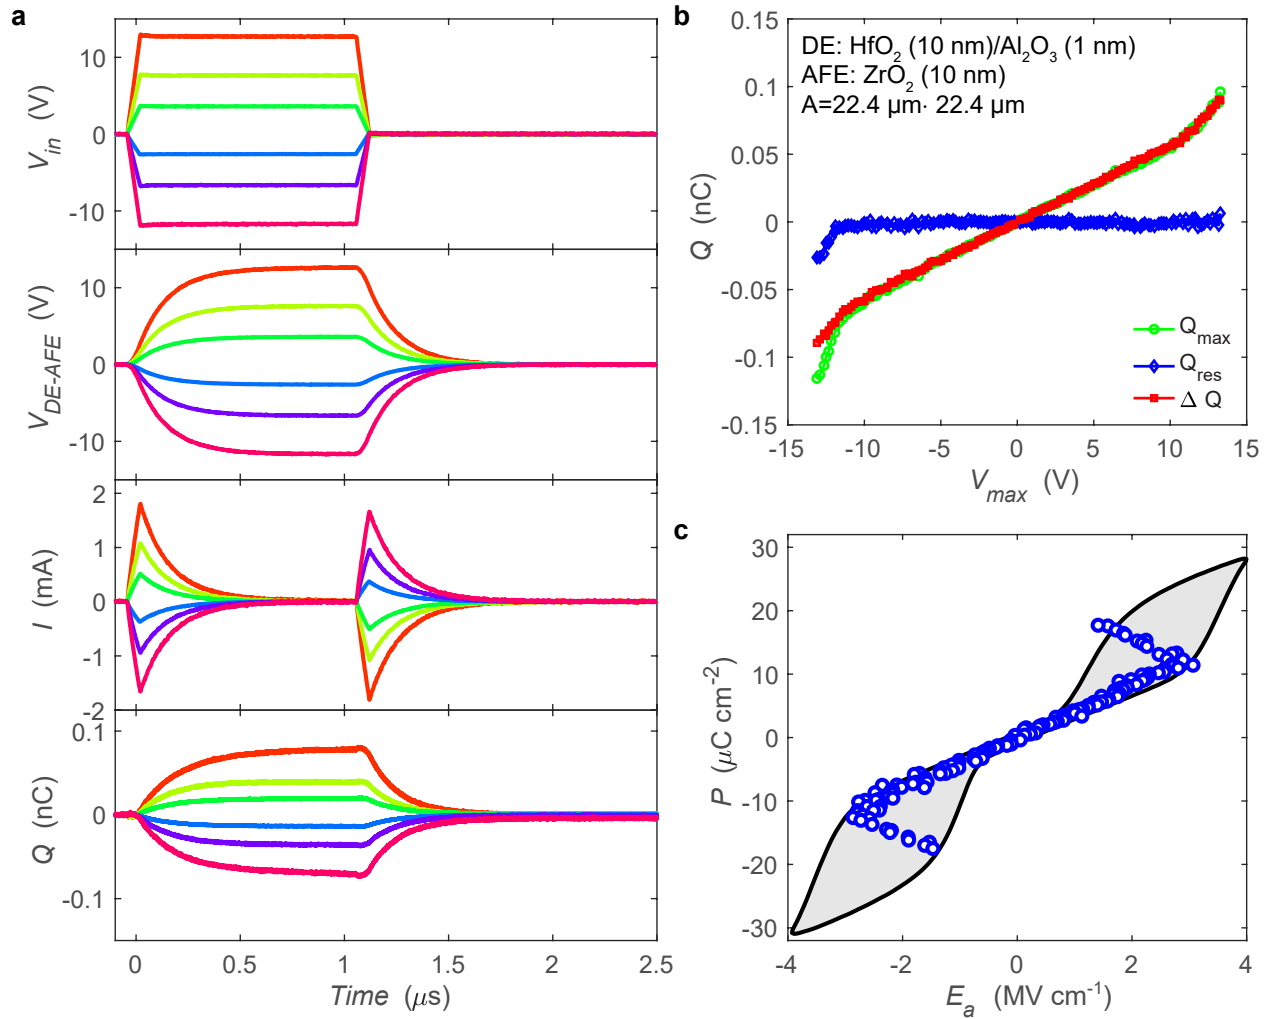

Supplementary Fig. 7: **Electrical measurement of a  $HfO_2(10 \text{ nm})/Al_2O_3(1 \text{ nm})/ZrO_2(10 \text{ nm})$  capacitor.** **a** Time domain waveforms of input voltage  $V_{in}$ , voltage across the heterostructure  $V_{DE-AFE}$ , current through the heterostructure  $I$ , and integrated charges  $Q$ . **b** Maximum charge  $Q_{max}$ , residual charge  $Q_{res}$ , and their difference  $\Delta Q$  as a function of maximum voltage across the heterostructure  $V_a$ . **c** Extracted polarization  $P$  - electric field  $E_a$  of the  $ZrO_2$  layer.

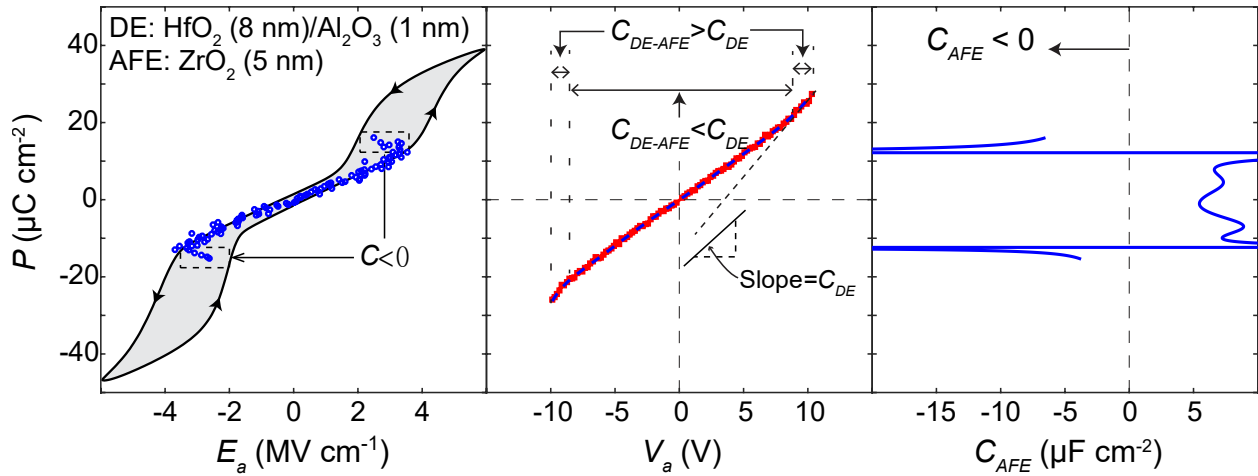

Supplementary Fig. 8: **Antiferroelectric layer thickness dependence on antiferroelectric negative capacitance.** Polarization  $P$  as functions of electric field  $E_a$  of the  $\text{ZrO}_2$  layer, maximum voltage across the dielectric/antiferroelectric capacitor  $V_a$ , antiferroelectric capacitance  $C_{AFE}$  measured in a  $\text{HfO}_2(8 \text{ nm})/\text{Al}_2\text{O}_3(1 \text{ nm})/\text{ZrO}_2(5 \text{ nm})$  heterostructure.  $C_{DE}$  and  $C_{DE-AFE}$  are the dielectric and total capacitance, respectively.

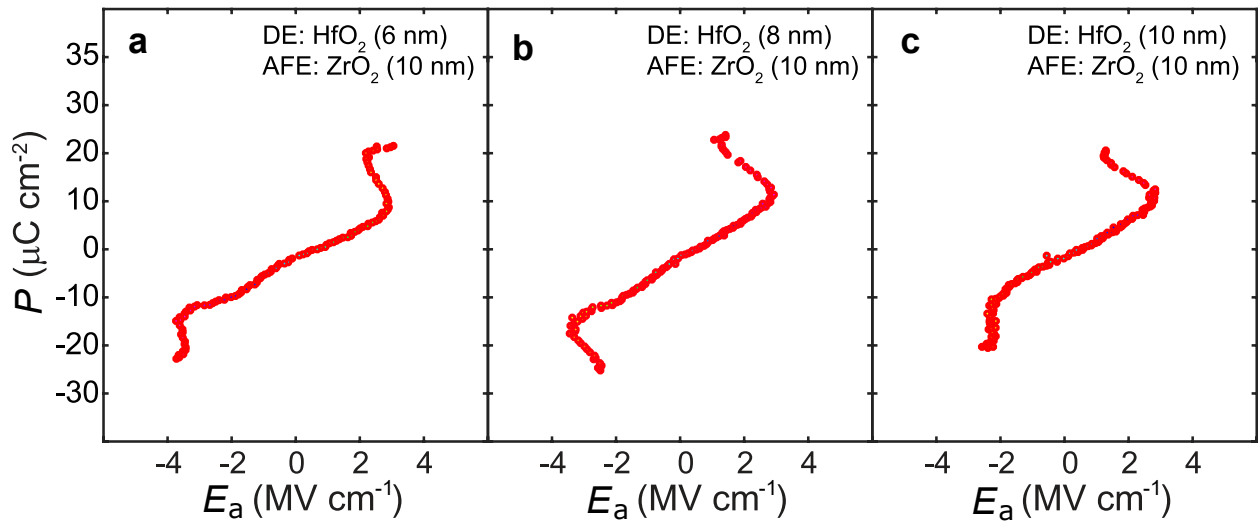

Supplementary Fig. 9: **Observation of the high-field positive capacitance branch.** Polarization  $P$  as a function of electric field  $E_a$  in the  $\text{ZrO}_2$  layer of antiferroelectric/dielectric capacitors with 10 nm  $\text{ZrO}_2$  and 6 nm (a), 8 nm (b) and 10 nm (c)  $\text{HfO}_2$ . Data was extracted from pulsed voltage measurements (pulse width  $1\mu\text{s}$ ) analogous to Supplementary Fig. 5-7.

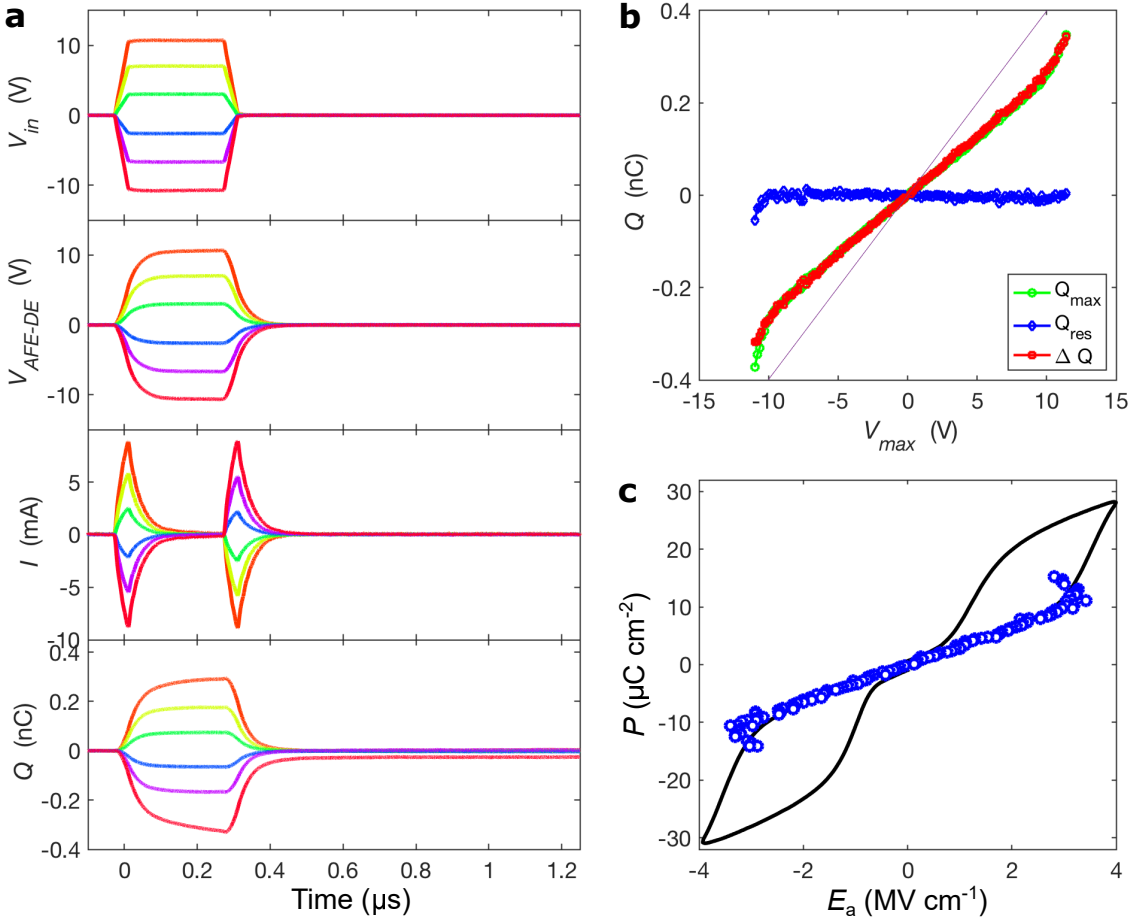

Supplementary Fig. 10: **Electrical measurement of a HfO<sub>2</sub>(8 nm)/Al<sub>2</sub>O<sub>3</sub>(1 nm)/ZrO<sub>2</sub>(10 nm) capacitor with  $R = 560 \Omega$ .** **a** Time domain waveforms of input voltage  $V_{in}$ , voltage across the heterostructure  $V_{DE-AFE}$ , current through the heterostructure  $I$ , and integrated charges  $Q$ . **b** Maximum charge  $Q_{max}$ , residual charge  $Q_{res}$ , and their difference  $\Delta Q$  as a function of maximum voltage across the heterostructure  $V_{max}$ . **c** Extracted polarization  $P$  - electric field  $E_a$  of the ZrO<sub>2</sub> layer.



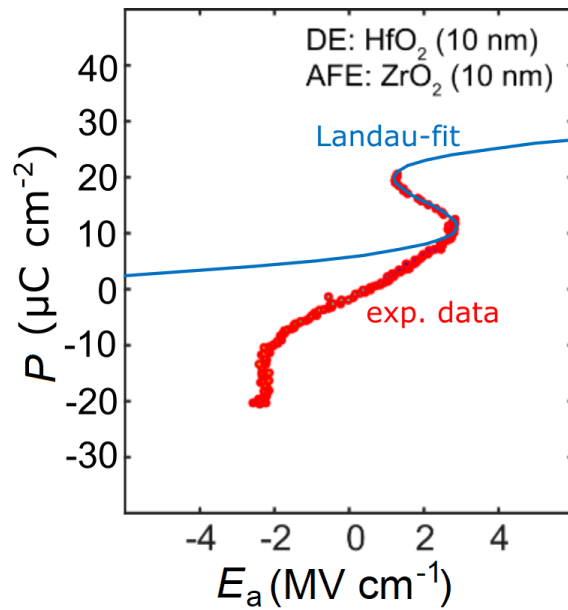

Supplementary Fig. 11: **Landau fitting of one of the negative capacitance regions.** Polarization  $P$  as a function of electric field  $E_a$  in the antiferroelectric ZrO<sub>2</sub> layer. Red dots show the data from short pulsed voltage measurements on a HfO<sub>2</sub>(10 nm)/ZrO<sub>2</sub>(10 nm) capacitor. The blue line shows the best fit of one of the negative capacitance regions using a simple Landau model as described in the Supplementary Methods.

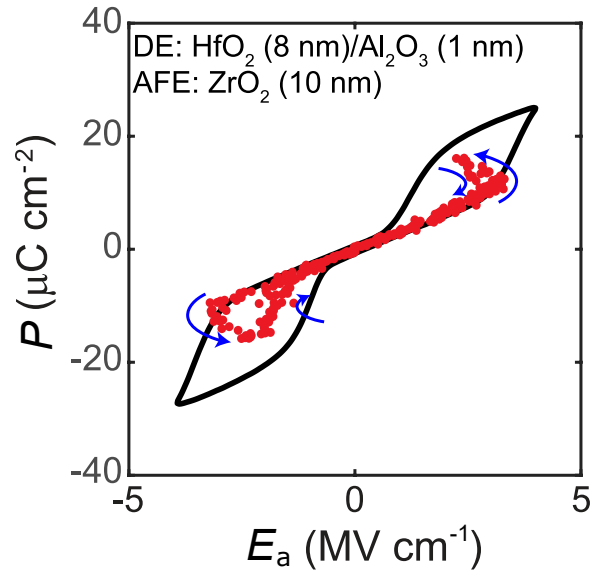

Supplementary Fig. 12: **Pulsed voltage hysteresis measurement.** Polarization  $P$  as a function of electric field  $E_a$  in the antiferroelectric ZrO<sub>2</sub> layer. The voltage pulse amplitude was first increased from 0 V to 11 V and then back to 0 V to -11 V and back to 0 V. Very small hysteresis is observed for positive applied voltages, since the leakage and charge trapping is small ( $Q_{res}$  is low). For negative applied voltages the hysteresis is large due to significant leakage current and subsequent charge trapping ( $Q_{res}$  is high).

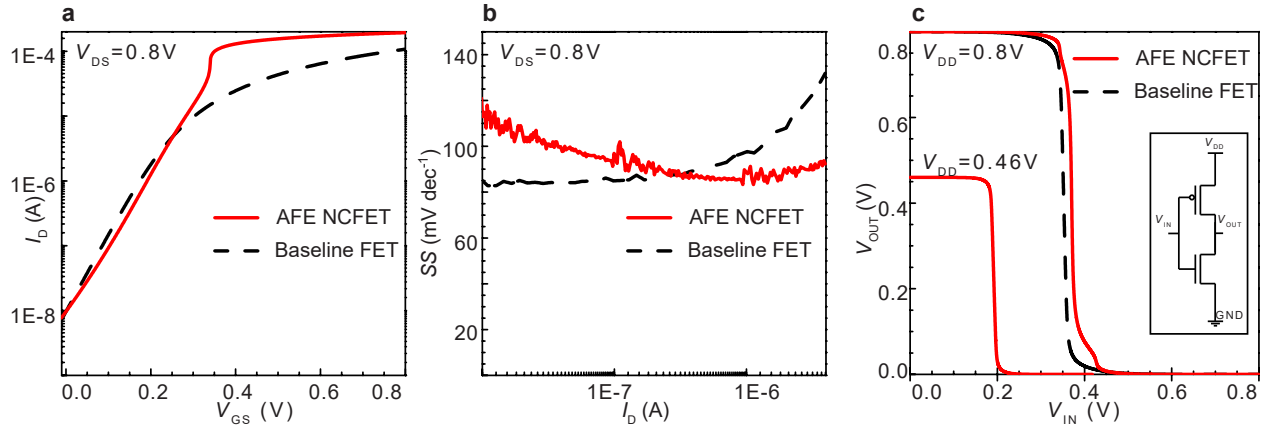

Supplementary Fig. 13: **Modeling of an antiferroelectric (AFE) negative capacitance field-effect transistor (NCFET).** **a,b** The drain current  $I_D$  vs. gate voltage  $V_{GS}$  characteristics (**a**) and the subthreshold swing ( $SS$ ) vs.  $I_D$  characteristics of an n-type AFE NCFET and the equivalent n-type baseline FinFET at a drain voltage  $V_{DS} = 0.8$  V. **c** The voltage transfer characteristics of a fan-out 4 (FO4) inverter based on AFE NCFET operating at power supply voltages  $V_{DD} = 0.8$  V and 0.46 V and a FO4 inverter based on the equivalent baseline transistor at  $V_{DD} = 0.8$  V.  $V_{IN}$  and  $V_{OUT}$  are the inverter input and output voltage, respectively. The details of the simulation framework is provided in Supplementary Methods. The power-performance comparison between the AFE NCFET and the equivalent baseline transistor based FO4 inverters is provided in Supplementary Table 1, which shows that the AFE NCFET is operating at a power supply voltage  $V_{DD} = 0.46$  V and achieves the same performance as that of the baseline transistor at  $V_{DD} = 0.8$  V, thereby reducing the power dissipation by 41%. The AFE NCFET simulations were performed by implementing a compact model based on the industry standard 15 nm Berkeley SPICE Insulated-Gate-FET Model: Common Multi Gate (BSIM-CMG) model.

## Supplementary References

1. Kittel, C. Theory of antiferroelectric crystals. *Phys. Rev.* **82**, 729–732 (1951).
2. Okada, K. Phenomenological theory of antiferroelectric transition. i. second-order transition. *J. Physical Soc. Japan* **27**, 420–428 (1969).
3. Cross, L. E. Antiferroelectric-ferroelectric switching in a simple “Kittel” antiferroelectric. *Journal of the Physical Society of Japan* **23**, 77–82 (1967).
4. Pešić, M., Hoffmann, M., Richter, C., Mikolajick, T. & Schroeder, U. Nonvolatile random access memory and energy storage based on antiferroelectric like hysteresis in ZrO<sub>2</sub>. *Adv. Func. Mater.* **26**, 7486–7494 (2016).
5. Tasneem, N. *et al.* A Janovec-Kay-Dunn-Like Behavior at Thickness Scaling in Ultra-Thin Antiferroelectric ZrO<sub>2</sub> Films. *Advanced Electronic Materials* **7**, 2100485 (2021).
